# Supplementary material for: Hinokitiol Exhibits Antitumor Properties through Induction of ROS-Mediated Apoptosis and p53-Driven Cell-Cycle Arrest in Endometrial Cancer Cell Lines (Ishikawa, HEC-1A, KLE)
Source: MDPI journal article supplement (doi:10.3390/ijms22158268), 2021-07-31

**Supplemant data-Table. 1. The dilution concentrations of all antibodies used in western blotting**

| Item                                         | Number    | Brand          | Dilution |
|----------------------------------------------|-----------|----------------|----------|
| Phospho-p53 (Ser15)                          | #9284     | Cell signaling | 1000     |
| CDK4                                         | #12790    | Cell signaling | 1000     |
| Cylcin D1                                    | ab134175  | Abcam          | 500      |
| PARP                                         | #9532     | Cell signaling | 1000     |
| BAX                                          | #2772     | Cell signaling | 1000     |
| BCL-2                                        | sc-7382   | SANTA CRUZ     | 500      |
| Caspase-3                                    | #9662     | Cell signaling | 1000     |
| LC3B                                         | #3868     | Cell signaling | 1000     |
| SQSTM1/p62                                   | #39749    | Cell signaling | 1000     |
| p44/42 MAPK (Erk1/2)                         | 9102s     | Cell signaling | 1000     |
| Phospho-p44/42 MAPK (Erk1/2) (Thr202/Tyr204) | 9101s     | Cell signaling | 1000     |
| Goat Anti-Rabbit IgG H&L (HRP) preadsorbed   | ab7090    | Abcam          | 10000    |
| Goat Anti-Mouse IgG H&L (HRP) preadsorbed    | ab97040   | Abcam          | 10000    |
| GAPDH                                        | HRP-60004 | Proteintech    | 10000    |

Supplemental data- Figure. 1. The raw data using western blotting.

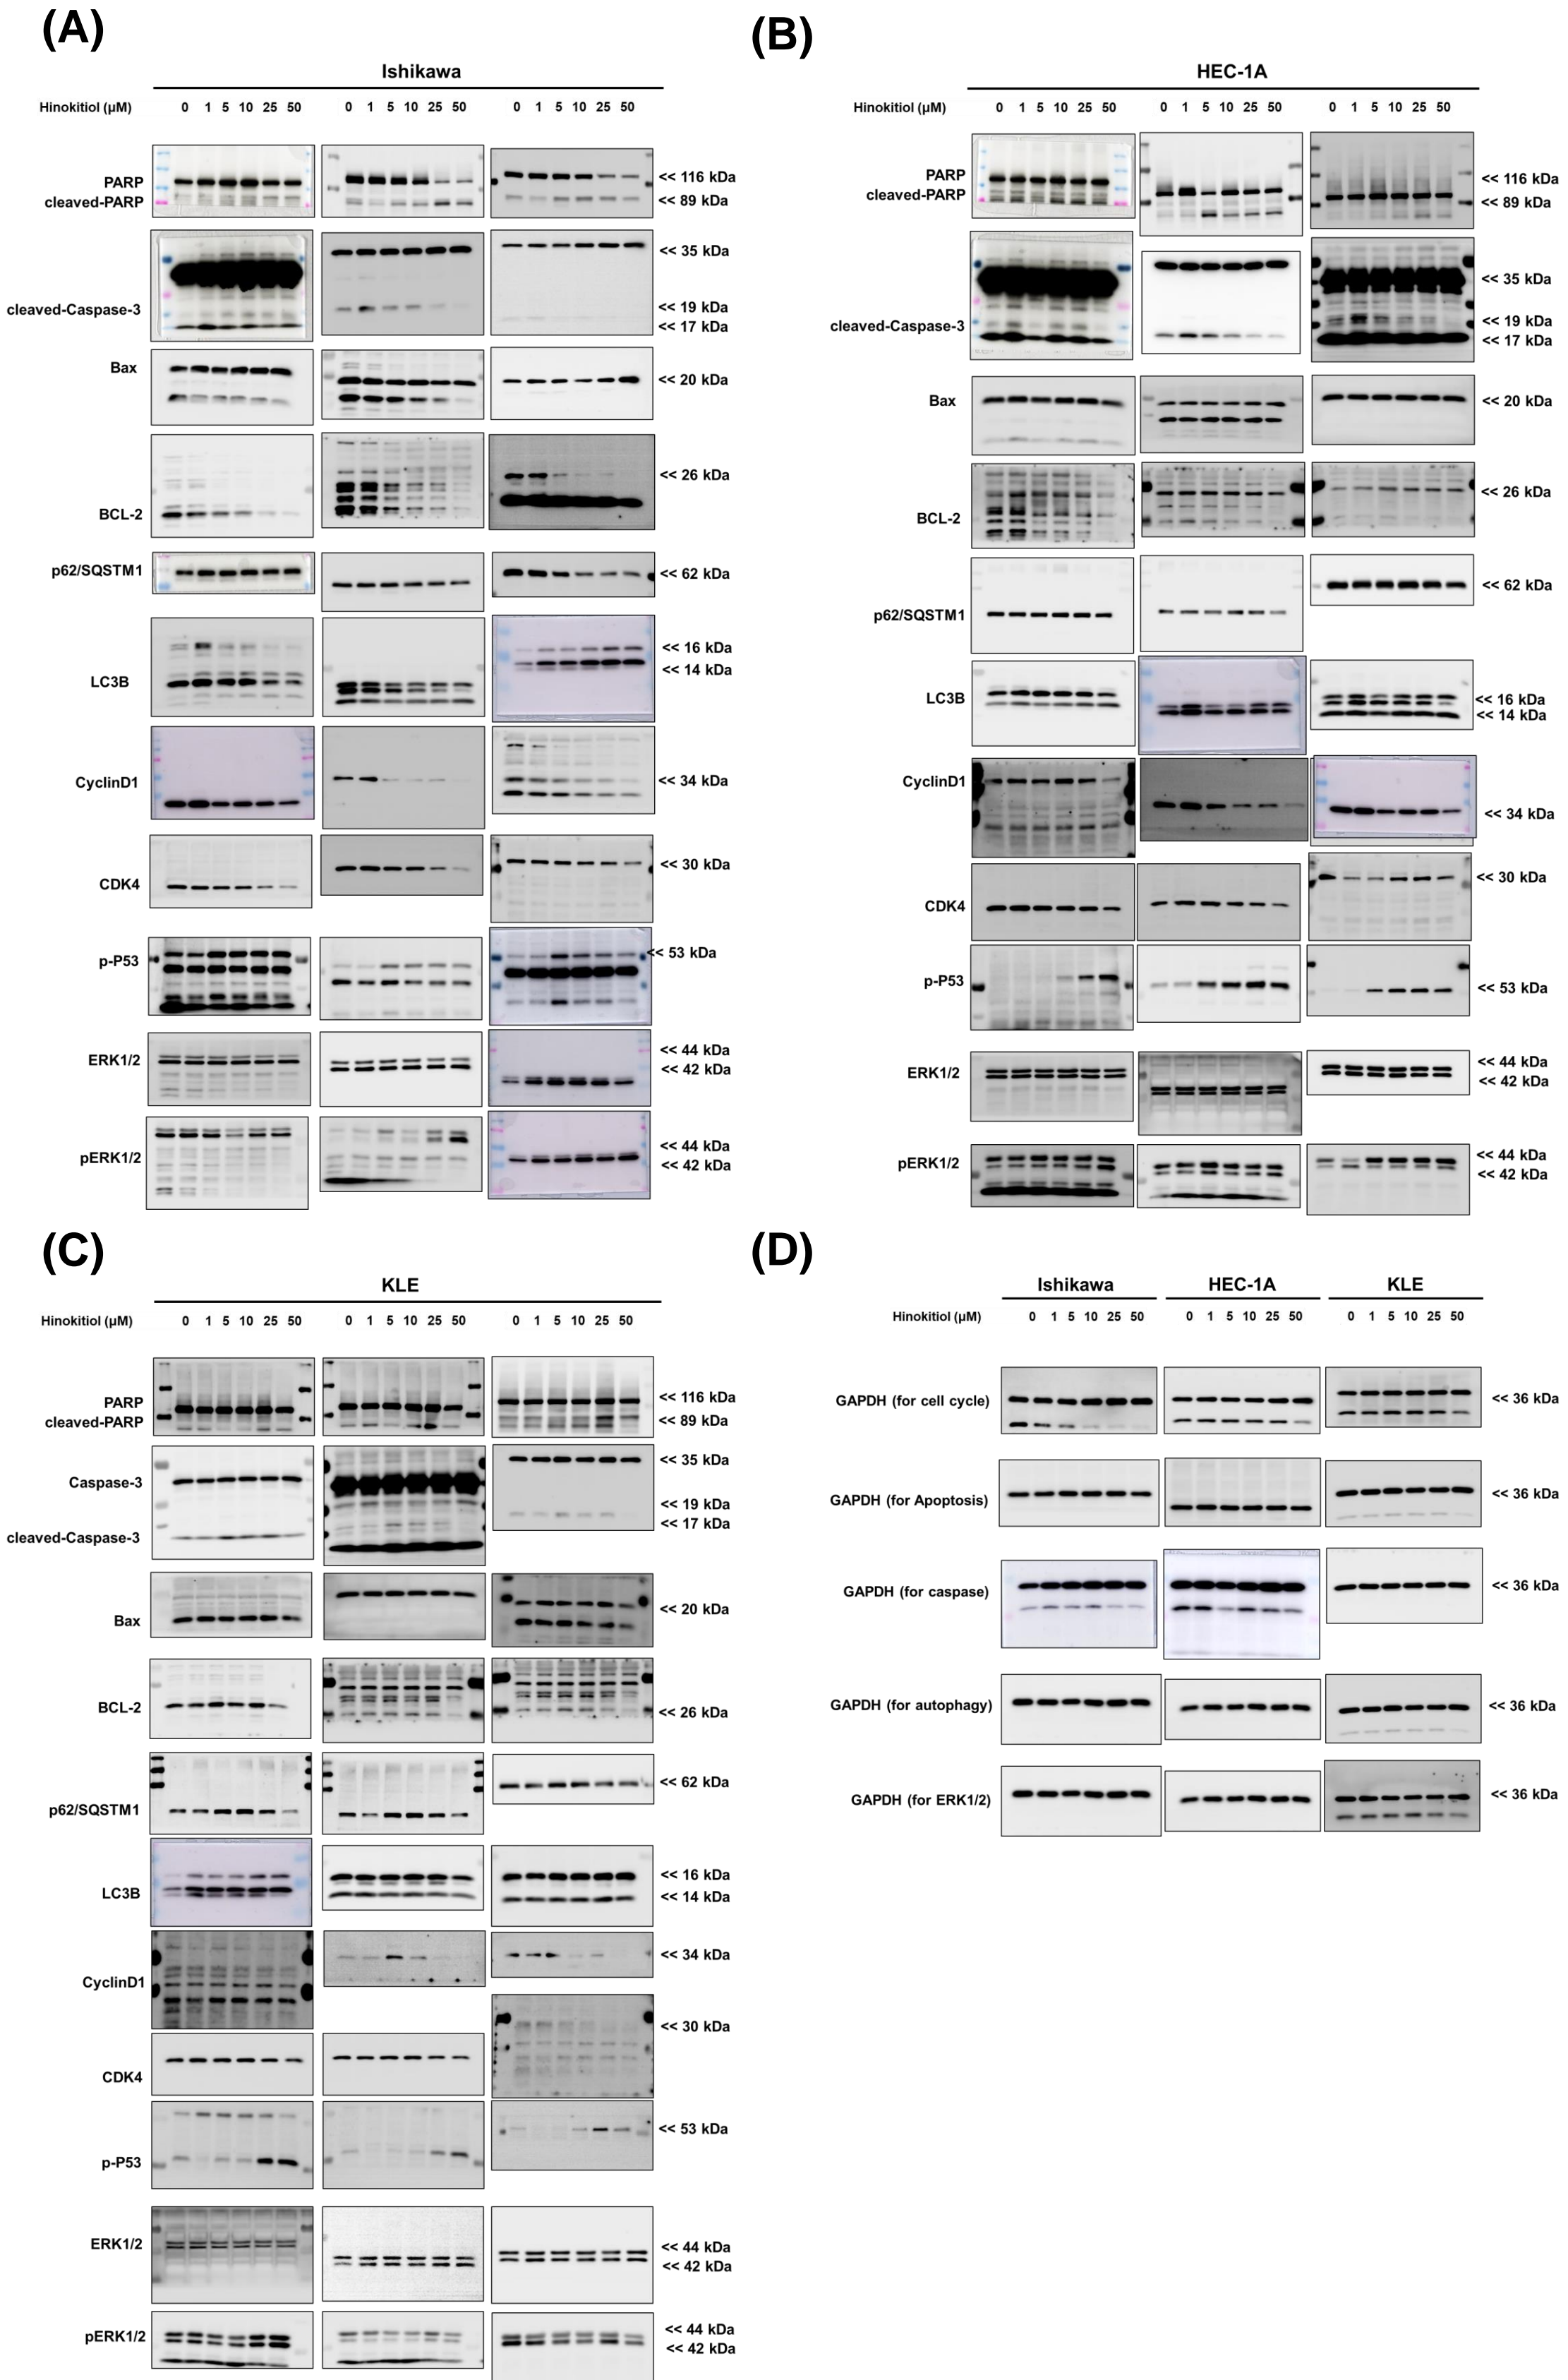

Supplement: s1 [file s1]
